# Supplementary material for: Pathogenicity and transmission of a swine influenza A(H6N6) virus
Source: PubMed Central journal article supplement (PMC5457681; doi:10.1038/emi.2017.3), 2017-04-12
Supplement: emi20173x1.pdf [file emi20173x1.pdf]

| Chart number                                                | Chart color                                   | Structure                                                                                                                                                                  |                                                  |
|-------------------------------------------------------------|-----------------------------------------------|----------------------------------------------------------------------------------------------------------------------------------------------------------------------------|--------------------------------------------------|
| <b><math>\alpha</math>2,3 sulfated sialosides</b>           |                                               |                                                                                                                                                                            |                                                  |
| 1                                                           | Red                                           | Neu5Aca2-3(6S)Galb1-4(Fuca1-3)GlcNAcb-Sp8                                                                                                                                  |                                                  |
| 2                                                           |                                               | Neu5Aca2-3(6S)Galb1-4GlcNAcb-Sp8                                                                                                                                           |                                                  |
| 3                                                           |                                               | Neu5Aca2-3Galb1-3(6S)GalNAca-Sp8                                                                                                                                           |                                                  |
| 4                                                           |                                               | Neu5Aca2-3Galb1-3(6S)GlcNAc-Sp8                                                                                                                                            |                                                  |
| 5                                                           |                                               | Neu5Aca2-3Galb1-4(6S)GlcNAcb-Sp8                                                                                                                                           |                                                  |
| <b><math>\alpha</math>2,3 di-, tri-, and qua-sialosides</b> |                                               |                                                                                                                                                                            |                                                  |
| 6                                                           | Green                                         | Neu5Aca2-3Galb1-3GalNAcb1-4(Neu5Aca2-3)Galb1-4Glc-Sp0                                                                                                                      |                                                  |
| 7                                                           |                                               | Neu5Aca2-3Galb1-3GalNAcb1-4(Neu5Aca2-8Neu5Aca2-3)Galb1-4Glc-Sp0                                                                                                            |                                                  |
| 8                                                           |                                               | Neu5Aca2-3Galb1-3GlcNAcb1-2Mana1-6(GlcNAcb1-4)(Neu5Aca2-3Galb1-3GlcNAcb1-2Mana1-3)Manb1-4GlcNAcb1-4GlcNAc-Sp21                                                             |                                                  |
| 9                                                           |                                               | Neu5Aca2-3Galb1-3GlcNAcb1-2Mana1-6(Neu5Aca2-3Galb1-3GlcNAcb1-2Mana1-3)Manb1-4GlcNAcb1-4GlcNAc-Sp19                                                                         |                                                  |
| 10                                                          |                                               | Neu5Aca2-3Galb1-3GlcNAcb1-6(Neu5Aca2-3Galb1-4GlcNAcb1-2)Mana1-6(Neu5Aca2-3Galb1-3GlcNAcb1-2Mana1-3)Manb1-4GlcNAcb1-4GlcNAcb-Sp19                                           |                                                  |
| 11                                                          |                                               | Neu5Aca2-3Galb1-4GlcNAcb1-2Mana1-6(GlcNAcb1-4)(Neu5Aca2-3Galb1-4GlcNAcb1-2Mana1-3)Manb1-4GlcNAcb1-4GlcNAcb-Sp21                                                            |                                                  |
| 12                                                          |                                               | Neu5Aca2-3Galb1-4GlcNAcb1-2Mana1-6(Neu5Aca2-3Galb1-4GlcNAcb1-2Mana1-3)Manb1-4GlcNAcb1-4(Fuca1-6)GlcNAcb-Sp24                                                               |                                                  |
| 13                                                          |                                               | Neu5Aca2-3Galb1-4GlcNAcb1-2Mana1-6(Neu5Aca2-3Galb1-4GlcNAcb1-2Mana1-3)Manb1-4GlcNAcb1-4GlcNAcb-Sp12                                                                        |                                                  |
| 14                                                          |                                               | Neu5Aca2-3Galb1-4GlcNAcb1-3Galb1-4GlcNAcb1-2Mana1-6(Neu5Aca2-3Galb1-4GlcNAcb1-3Galb1-4GlcNAcb1-2Mana1-3)Manb1-4GlcNAcb1-4GlcNAcb-Sp12                                      |                                                  |
| 15                                                          |                                               | Neu5Aca2-3Galb1-4GlcNAcb1-3Galb1-4GlcNAcb1-3Galb1-4GlcNAcb1-2Mana1-6(Neu5Aca2-3Galb1-4GlcNAcb1-3Galb1-4GlcNAcb1-3Galb1-4GlcNAcb1-2Mana1-3)Manb1-4GlcNAcb1-4GlcNAcb-Sp12    |                                                  |
| 16                                                          |                                               | Neu5Aca2-3Galb1-4GlcNAcb1-3Galb1-4GlcNAcb1-6(Neu5Aca2-3Galb1-4GlcNAcb1-3Galb1-4GlcNAcb1-3)GalNAca-Sp14                                                                     |                                                  |
| 17                                                          |                                               | Neu5Aca2-3Galb1-4GlcNAcb1-6(Neu5Aca2-3Galb1-3)GalNAca-Sp14                                                                                                                 |                                                  |
| 18                                                          |                                               | Neu5Aca2-3Galb1-4GlcNAcb1-6(Neu5Aca2-3Galb1-4GlcNAcb1-3)GalNAca-Sp14                                                                                                       |                                                  |
| 19                                                          |                                               | Neu5Gca2-3Galb1-4GlcNAcb1-3Galb1-4GlcNAcb1-2Mana1-6(Neu5Gca2-3Galb1-4GlcNAcb1-3Galb1-4GlcNAcb1-2Mana1-3)Manb1-4GlcNAcb1-4GlcNAcb-Sp24                                      |                                                  |
| 20                                                          |                                               | Neu5Aca2-3Galb1-4GlcNAcb1-4Mana1-6(GlcNAcb1-4)(Neu5Aca2-3Galb1-4GlcNAcb1-4)(Neu5Aca2-3Galb1-4GlcNAcb1-2)Mana1-3)Manb1-4GlcNAcb1-4GlcNAcb-Sp21                              |                                                  |
| 21                                                          |                                               | Neu5Aca2-3Galb1-4GlcNAcb1-6(Neu5Aca2-3Galb1-4GlcNAcb1-2)Mana1-6(GlcNAcb1-4)(Neu5Aca2-3Galb1-4GlcNAcb1-2)Mana1-3)Manb1-4GlcNAcb1-4GlcNAcb-Sp21                              |                                                  |
| 22                                                          |                                               | Neu5Aca2-3Galb1-4GlcNAcb1-6(Neu5Aca2-3Galb1-4GlcNAcb1-2)Mana1-6(GlcNAcb1-4)(Neu5Aca2-3Galb1-4GlcNAcb1-4)(Neu5Aca2-3Galb1-4GlcNAcb1-2)Mana1-3)Manb1-4GlcNAcb1-4GlcNAcb-Sp21 |                                                  |
| <b><math>\alpha</math>2,3 linear sialosides</b>             |                                               |                                                                                                                                                                            |                                                  |
| 23                                                          |                                               | Yellow                                                                                                                                                                     | Neu5Aca2-3Galb1-3GalNAca-Sp8                     |
| 24                                                          |                                               |                                                                                                                                                                            | Neu5Aca2-3Galb1-3GalNAcb1-3Gala1-4Galb1-4Glc-Sp0 |
| 25                                                          |                                               |                                                                                                                                                                            | Neu5Aca2-3Galb1-3GlcNAcb1-2Mana-Sp0              |
| 26                                                          |                                               |                                                                                                                                                                            | Neu5Aca2-3Galb1-3GlcNAcb1-3Galb1-3GlcNAcb-Sp0    |
| 27                                                          | Neu5Aca2-3Galb1-3GlcNAcb1-3Galb1-4GlcNAcb-Sp0 |                                                                                                                                                                            |                                                  |
| 28                                                          | Neu5Aca2-3Galb1-3GlcNAcb1-3GalNAca-Sp14       |                                                                                                                                                                            |                                                  |
| 29                                                          | Neu5Aca2-3Galb1-3GlcNAcb1-4Galb1-4Glc-Sp0     |                                                                                                                                                                            |                                                  |
| 30                                                          | Neu5Aca2-3Galb1-3GlcNAcb1-6GalNAca-Sp14       |                                                                                                                                                                            |                                                  |

|    |                                                                   |
|----|-------------------------------------------------------------------|
| 31 | Neu5Aca2-3Galb1-3GlcNAcb-Sp0                                      |
| 32 | Neu5Aca2-3Galb1-3GlcNAcb-Sp8                                      |
| 33 | Neu5Aca2-3Galb1-4GlcNAcb1-2Mana-Sp0                               |
| 34 | Neu5Aca2-3Galb1-4GlcNAcb1-3Galb1-3GlcNAcb-Sp0                     |
| 35 | Neu5Aca2-3Galb1-4GlcNAcb1-3Galb1-4GlcNAcb1-3Galb1-4GlcNAcb-Sp0    |
| 36 | Neu5Aca2-3Galb1-4GlcNAcb1-3Galb1-4GlcNAcb1-3GalNAca-Sp14          |
| 37 | Neu5Aca2-3Galb1-4GlcNAcb1-3Galb1-4GlcNAcb1-6(Galb1-3)GalNAca-Sp14 |
| 38 | Neu5Aca2-3Galb1-4GlcNAcb1-3Galb1-4GlcNAcb-Sp0                     |
| 39 | Neu5Aca2-3Galb1-4GlcNAcb1-3Galb-Sp8                               |
| 40 | Neu5Aca2-3Galb1-4GlcNAcb1-3GalNAc-Sp14                            |
| 41 | Neu5Aca2-3Galb1-4GlcNAcb1-6GalNAca-Sp14                           |
| 42 | Neu5Aca2-3Galb1-4GlcNAcb-Sp0                                      |
| 43 | Neu5Aca2-3Galb1-4GlcNAcb-Sp8                                      |
| 44 | Neu5Aca2-3Galb-Sp8                                                |
| 45 | Neu5Aca2-3GalNAca-Sp8                                             |
| 46 | Neu5Aca2-3GalNAcb1-4GlcNAcb-Sp0                                   |
| 47 | Neu5Gca2-3Galb1-3GlcNAcb-Sp0                                      |
| 48 | Neu5Gca2-3Galb1-4Glc-Sp0                                          |
| 49 | Neu5Gca2-3Galb1-4GlcNAcb-Sp0                                      |

$\alpha$ 2,3 Fucosylated sialosides

|    |                                                                                           |
|----|-------------------------------------------------------------------------------------------|
| 50 | Neu5Aca2-3Galb1-3(Fuca1-4)GlcNAcb1-3Galb1-3(Fuca1-4)GlcNAcb-Sp0                           |
| 51 | Neu5Aca2-3Galb1-3(Fuca1-4)GlcNAcb1-3Galb1-4(Fuca1-3)GlcNAcb-Sp0                           |
| 52 | Neu5Aca2-3Galb1-3(Fuca1-4)GlcNAcb-Sp8                                                     |
| 53 | Neu5Aca2-3Galb1-3GalNAca-Sp14                                                             |
| 54 | Neu5Aca2-3Galb1-4(Fuca1-3)(6S)GlcNAcb-Sp8                                                 |
| 55 | Neu5Aca2-3Galb1-4(Fuca1-3)GlcNAcb1-2Mana-Sp0                                              |
| 56 | Neu5Aca2-3Galb1-4(Fuca1-3)GlcNAcb1-3Galb1-4(Fuca1-3)GlcNAcb1-3Galb1-4(Fuca1-3)GlcNAcb-Sp0 |
| 57 | Neu5Aca2-3Galb1-4(Fuca1-3)GlcNAcb1-3Galb1-4GlcNAcb-Sp8                                    |
| 58 | Neu5Aca2-3Galb1-4(Fuca1-3)GlcNAcb1-3Galb-Sp8                                              |
| 59 | Neu5Aca2-3Galb1-4(Fuca1-3)GlcNAcb1-3GalNAca-Sp14                                          |
| 60 | Neu5Aca2-3Galb1-4(Fuca1-3)GlcNAcb1-6(Galb1-3)GalNAca-Sp14                                 |
| 61 | Neu5Aca2-3Galb1-4(Fuca1-3)GlcNAcb1-6(Neu5Aca2-3Galb1-3)GalNAc-Sp14                        |
| 62 | Neu5Aca2-3Galb1-4(Fuca1-3)GlcNAcb-Sp0                                                     |
| 63 | Neu5Aca2-3Galb1-4(Fuca1-3)GlcNAcb-Sp8                                                     |
| 64 | Neu5Aca2-3Galb1-4(Neu5Aca2-3Galb1-3)GlcNAcb-Sp8                                           |

---

|    |                                                        |
|----|--------------------------------------------------------|
| 65 | Neu5Aca2-3Galb1-4GlcB-Sp0                              |
| 66 | Neu5Aca2-3Galb1-4GlcB-Sp8                              |
| 67 | Neu5Aca2-3Galb1-4GlcNAcb1-3Galb1-4(Fuca1-3)GlcNAcb-Sp0 |
| 68 | Neu5Gca2-3Galb1-3(Fuca1-4)GlcNAcb-Sp0                  |
| 69 | Neu5Gca2-3Galb1-4(Fuca1-3)GlcNAcb-Sp0                  |

$\alpha$ 2,3 internal sialosides

|    |                                                                            |
|----|----------------------------------------------------------------------------|
| 70 | Galb1-3GalNAcb1-4(Neu5Aca2-8Neu5Aca2-3)Galb1-4GlcB-Sp0                     |
| 71 | Galb1-3GalNAcb1-4(Neu5Aca2-8Neu5Aca2-8Neu5Aca2-3)Galb1-4GlcB-Sp21          |
| 72 | GalNAcb1-4(Neu5Aca2-3)Galb1-4GlcB-Sp0                                      |
| 73 | GalNAcb1-4(Neu5Aca2-3)Galb1-4GlcNAcb1-3GalNAca-Sp14                        |
| 74 | GalNAcb1-4(Neu5Aca2-3)Galb1-4GlcNAcb-Sp0                                   |
| 75 | GalNAcb1-4(Neu5Aca2-3)Galb1-4GlcNAcb-Sp8                                   |
| 76 | GalNAcb1-4(Neu5Aca2-8Neu5Aca2-3)Galb1-4GlcB-Sp0                            |
| 77 | GalNAcb1-4(Neu5Aca2-8Neu5Aca2-8Neu5Aca2-3)Galb1-4GlcB-Sp0                  |
| 78 | GalNAcb1-4(Neu5Aca2-8Neu5Aca2-8Neu5Aca2-8Neu5Aca2-3)Galb1-4GlcB-Sp0        |
| 79 | GlcNAcb1-6(Neu5Aca2-3Galb1-3)GalNAca-Sp14                                  |
| 80 | Neu5Aca2-3Galb1-4GlcNAcb1-6(Galb1-3)GalNAca-Sp14                           |
| 81 | Neu5Aca2-8Neu5Aca2-3Galb1-3GalNAcb1-4(Neu5Aca2-3)Galb1-4Glc-Sp21           |
| 82 | Neu5Aca2-8Neu5Aca2-3Galb1-3GalNAcb1-4(Neu5Aca2-8Neu5Aca2-3)Galb1-4GlcB-Sp0 |
| 83 | Neu5Aca2-8Neu5Aca2-3Galb1-4GlcB-Sp0                                        |
| 84 | Neu5Aca2-8Neu5Aca2-3Galb1-4GlcNAc-Sp0                                      |
| 85 | Neu5Aca2-8Neu5Aca2-8Neu5Aca2-3Galb1-4GlcB-Sp0                              |
| 86 | Neu5Aca2-8Neu5Gca2-3Galb1-4GlcNAc-Sp0                                      |
| 87 | Neu5Gca2-8Neu5Aca2-3Galb1-4GlcNAc-Sp0                                      |
| 88 | Neu5Gca2-8Neu5Gca2-3Galb1-4GlcNAcb1-3Galb1-4GlcNAc-Sp0                     |
| 89 | Neu5Gca2-8Neu5Gca2-3Galb1-4GlcNAc-Sp0                                      |
| 90 | Fuca1-2Galb1-3GalNAcb1-4(Neu5Aca2-3)Galb1-4GlcB-Sp0                        |
| 91 | Fuca1-2Galb1-3GalNAcb1-4(Neu5Aca2-3)Galb1-4GlcB-Sp9                        |
| 92 | Galb1-3GalNAcb1-4(Neu5Aca2-3)Galb1-4GlcB-Sp0                               |

$\alpha$ 2,3  $\alpha$ 2,6 sialosides

|    |                                                                                                     |
|----|-----------------------------------------------------------------------------------------------------|
| 93 | Neu5Aca2-6Galb1-4GlcNAcb1-2Mana1-6(Neu5Aca2-3Galb1-4GlcNAcb1-2Mana1-3)Manb1-4GlcNAcb1-4GlcNAcb-Sp12 |
| 94 | Neu5Aca2-6(Neu5Aca2-3)GalNAca-Sp8                                                                   |
| 95 | Neu5Aca2-6(Neu5Aca2-3Galb1-3)GalNAca-Sp14                                                           |
| 96 | Neu5Aca2-6(Neu5Aca2-3Galb1-3)GalNAca-Sp8                                                            |

---

|                                                           |                                                                                                                                                                           |
|-----------------------------------------------------------|---------------------------------------------------------------------------------------------------------------------------------------------------------------------------|
| 97                                                        | Neu5Aca2-3Galb1-4GlcNAcb1-2Mana1-6(Neu5Aca2-6Galb1-4GlcNAcb1-2Mana1-3)Manb1-4GlcNAcb1-4GlcNAcb-Sp12                                                                       |
| 98                                                        | Galb1-4(Fuca1-3)GlcNAcb1-6(Neu5Aca2-6(Neu5Aca2-3Galb1-3)GlcNAcb1-3)Galb1-4Glc-Sp21                                                                                        |
| $\alpha$ 2,6 sialosides in the same order to $\alpha$ 2,3 |                                                                                                                                                                           |
| 99                                                        | Neu5Aca2-6Galb1-4(6S)GlcNAcb-Sp8                                                                                                                                          |
| 100                                                       | Neu5Aca2-6GalNAcb1-4(6S)GlcNAcb-Sp8                                                                                                                                       |
| 101                                                       | Neu5Aca2-6Galb1-4 GlcNAcb1-6(Neu5Aca2-6Galb1-4GlcNAcb1-3)GalNAca-Sp14                                                                                                     |
| 102                                                       | Neu5Aca2-6Galb1-4GlcNAcb1-2Mana1-6(GlcNAcb1-4)(Neu5Aca2-6Galb1-4GlcNAcb1-2Mana1-3)Manb1-4GlcNAcb1-4GlcNAcb-Sp21                                                           |
| 103                                                       | Neu5Aca2-6Galb1-4GlcNAcb1-2Mana1-6(Neu5Aca2-6Galb1-4GlcNAcb1-2Mana1-3)Manb1-4GlcNAcb1-4(Fuca1-6)GlcNAcb-Sp24                                                              |
| 104                                                       | Neu5Aca2-6Galb1-4GlcNAcb1-2Mana1-6(Neu5Aca2-6Galb1-4GlcNAcb1-2Mana1-3)Manb1-4GlcNAcb1-4GlcNAcb-Sp12                                                                       |
| 105                                                       | Neu5Aca2-6Galb1-4GlcNAcb1-2Mana1-6(Neu5Aca2-6Galb1-4GlcNAcb1-2Mana1-3)Manb1-4GlcNAcb1-4GlcNAcb-Sp13                                                                       |
| 106                                                       | Neu5Aca2-6Galb1-4GlcNAcb1-2Mana1-6(Neu5Aca2-6Galb1-4GlcNAcb1-2Man-a1-3)Manb1-4GlcNAcb1-4GlcNAcb-Sp21                                                                      |
| 107                                                       | Neu5Aca2-6Galb1-4GlcNAcb1-2Mana1-6(Neu5Aca2-6Galb1-4GlcNAcb1-2Mana1-3)Manb1-4GlcNAcb1-4GlcNAcb-Sp24                                                                       |
| 108                                                       | Neu5Aca2-6Galb1-4GlcNAcb1-3Galb1-4GlcNAcb1-2Mana1-6(Neu5Aca2-6Galb1-4GlcNAcb1-3Galb1-4GlcNAcb1-2Mana1-3)Manb1-4GlcNAcb1-4GlcNAcb-Sp12                                     |
| 109                                                       | Neu5Aca2-6Galb1-4GlcNAcb1-3Galb1-4GlcNAcb1-3Galb1-4GlcNAcb1-2Mana1-6(Neu5Aca2-6Galb1-4GlcNAcb1-3Galb1-4GlcNAcb1-3Galb1-4GlcNAcb1-2Mana1-3)Manb1-4GlcNAcb1-4GlcNAcb-Sp12   |
| 110                                                       | Neu5Aca2-6Galb1-4GlcNAcb1-3Galb1-4GlcNAcb1-6(Neu5Aca2-6Galb1-4GlcNAcb1-3Galb1-4GlcNAcb1-3)GalNAca-Sp14                                                                    |
| 111                                                       | Neu5Aca2-6Galb1-4GlcNAcb1-4Mana1-6(GlcNAcb1-4)(Neu5Aca2-6Galb1-4GlcNAcb1-4(Neu5Aca2-6Galb1-4GlcNAcb1-2)Mana1-3)Manb1-4GlcNAcb1-4GlcNAcb-Sp21                              |
| 112                                                       | Neu5Aca2-6Galb1-4GlcNAcb1-6(Neu5Aca2-6Galb1-4GlcNAcb1-2)Mana1-6(GlcNAcb1-4)(Neu5Aca2-6Galb1-4GlcNAcb1-2Mana1-3)Manb1-4GlcNAcb1-4GlcNAcb-Sp21                              |
| 113                                                       | Neu5Aca2-6Galb1-4GlcNAcb1-6(Neu5Aca2-6Galb1-4GlcNAcb1-2)Mana1-6(GlcNAcb1-4)(Neu5Aca2-6Galb1-4GlcNAcb1-4(Neu5Aca2-6Galb1-4GlcNAcb1-2)Mana1-3)Manb1-4GlcNAcb1-4GlcNAcb-Sp21 |
| 114                                                       | Neu5Aca2-6Galb1-4Glc-Sp0                                                                                                                                                  |
| 115                                                       | Neu5Aca2-6Galb1-4Glc-Sp8                                                                                                                                                  |
| 116                                                       | Neu5Aca2-6Galb1-4GlcNAcb1-2Mana1-3Manb1-4GlcNAcb1-4GlcNAc-Sp12                                                                                                            |
| 117                                                       | Neu5Aca2-6Galb1-4GlcNAcb1-2Mana1-6Manb1-4GlcNAcb1-4GlcNAc-Sp12                                                                                                            |
| 118                                                       | Neu5Aca2-6Galb1-4GlcNAcb1-2Man-Sp0                                                                                                                                        |
| 119                                                       | Neu5Aca2-6Galb1-4GlcNAcb1-3Galb1-3GlcNAcb-Sp0                                                                                                                             |
| 120                                                       | Neu5Aca2-6Galb1-4GlcNAcb1-3Galb1-4GlcNAcb1-3Galb1-4GlcNAcb-Sp0                                                                                                            |
| 121                                                       | Neu5Aca2-6Galb1-4GlcNAcb1-3Galb1-4GlcNAcb1-3GalNAca-Sp14                                                                                                                  |
| 122                                                       | Neu5Aca2-6Galb1-4GlcNAcb1-3Galb1-4GlcNAcb-Sp0                                                                                                                             |
| 123                                                       | Neu5Aca2-6Galb1-4GlcNAcb1-3GalNAc-Sp14                                                                                                                                    |
| 124                                                       | Neu5Aca2-6Galb1-4GlcNAcb1-6GalNAca-Sp14                                                                                                                                   |
| 125                                                       | Neu5Aca2-6Galb1-4GlcNAcb-Sp0                                                                                                                                              |
| 126                                                       | Neu5Aca2-6Galb1-4GlcNAcb-Sp8                                                                                                                                              |
| 127                                                       | Neu5Aca2-6Galb-Sp8                                                                                                                                                        |
| 128                                                       | Neu5Aca2-6GalNAca-Sp8                                                                                                                                                     |
| 129                                                       | Neu5Aca2-6GalNAcb1-4GlcNAcb-Sp0                                                                                                                                           |
| 130                                                       | Neu5Aca2-6GlcNAcb1-4GlcNAcb1-4GlcNAc-Sp21                                                                                                                                 |
| 131                                                       | Neu5Aca2-6GlcNAcb1-4GlcNAc-Sp21                                                                                                                                           |

|     |                                                                                           |
|-----|-------------------------------------------------------------------------------------------|
| 132 | Neu5Ac2-6Galb1-4GlcNAcb-Sp8                                                               |
| 133 | Neu5Ac2-6GalNAca-Sp8                                                                      |
| 134 | Neu5Gca2-6Galb1-4GlcNAcb-Sp0                                                              |
| 135 | Neu5Gca2-6GalNAca-Sp0                                                                     |
| 136 | Neu5Aca2-6Galb1-4GlcNAcb1-3Galb1-4(Fuca1-3)GlcNAcb1-3Galb1-4(Fuca1-3)GlcNAcb-Sp0          |
| 137 | Neu5Aca2-6Galb1-4GlcNAcb1-6(Fuca1-2Galb1-3GlcNAcb1-3)Galb1-4Glc-Sp21                      |
| 138 | Neu5Aca2-6Galb1-4GlcNAcb1-6(Fuca1-2Galb1-4(Fuca1-3)GlcNAcb1-3)Galb1-4Glc-Sp21             |
| 139 | Galb1-4GlcNAcb1-2Mana1-6(Neu5Aca2-6Galb1-4GlcNAcb1-2Mana1-3)Manb1-4GlcNAcb1-4GlcNAcb-Sp12 |
| 140 | Galb1-4GlcNAcb1-6(Neu5Aca2-6Galb1-3GlcNAcb1-3)Galb1-4Glc-Sp21                             |
| 141 | GlcNAcb1-2Mana1-6(Neu5Aca2-6Galb1-4GlcNAcb1-2Mana1-3)Manb1-4GlcNAcb1-4GlcNAcb-Sp12        |
| 142 | Mana1-6(Neu5Aca2-6Galb1-4GlcNAcb1-2Mana1-3)Manb1-4GlcNAcb1-4GlcNAcb-Sp12                  |
| 143 | Neu5Aca2-6(Galb1-3)GalNAca-Sp14                                                           |
| 144 | Neu5Aca2-6(Galb1-3)GalNAca-Sp8                                                            |
| 145 | Neu5Aca2-6(Galb1-3)GlcNAcb1-4Galb1-4Glc-Sp10                                              |
| 146 | Neu5Aca2-6Galb1-4GlcNAcb1-2Mana1-6(Galb1-4GlcNAcb1-2Mana1-3)Manb1-4GlcNAcb1-4GlcNAcb-Sp12 |
| 147 | Neu5Aca2-6Galb1-4GlcNAcb1-2Mana1-6(GlcNAcb1-2Mana1-3)Manb1-4GlcNAcb1-4GlcNAcb-Sp12        |
| 148 | Neu5Aca2-6Galb1-4GlcNAcb1-2Mana1-6(Mana1-3)Manb1-4GlcNAcb1-4GlcNAcb-Sp12                  |
| 149 | Neu5Aca2-6Galb1-4GlcNAcb1-3Galb1-4GlcNAcb1-6(Galb1-3)GalNAca-Sp14                         |
| 150 | Neu5Aca2-6Galb1-4GlcNAcb1-6(Galb1-3)GalNAca-Sp14                                          |
| 151 | Neu5Aca2-6Galb1-4GlcNAcb1-6(Galb1-3GlcNAcb1-3)Galb1-4Glc-Sp21                             |
| 152 | Neu5Ac2-6(Galb1-3)GalNAca-Sp8                                                             |
| 153 | Neu5Gca2-8Neu5Gca2-6Galb1-4GlcNAcb-Sp0                                                    |

The table is color-coded according to text Figure 4 and glycans are consistent with Figure 4.

Key: Neu5Ac, sialic acid; OSO<sub>3</sub>, sulfate; Gal, galactose; Fuc, fucose; GalNAc, *N*-acetyl-d-galactosamine; Glc, glucose; Man, mannose; SP0, -CH<sub>2</sub>CH<sub>2</sub>NH<sub>2</sub>; SP8, -CH<sub>2</sub>CH<sub>2</sub>CH<sub>2</sub>NH<sub>2</sub>; Sp9, -CH<sub>2</sub>CH<sub>2</sub>CH<sub>2</sub>CH<sub>2</sub>CH<sub>2</sub>NH<sub>2</sub>; Sp10, -NHCOCH<sub>2</sub>NH; SP12, Asparagine; Sp13, glycine; SP14, Threonine; Sp19, EN or NK; Sp21, -N(CH<sub>3</sub>)-O-(CH<sub>2</sub>)<sub>2</sub>-NH<sub>2</sub>; Sp24, KVANKT.

## Supplementary Table S1 Sialic acid–linked glycans represented on the glycan microarray
